# Supplementary material for: Transcriptome sequencing reveals the differentially expressed lncRNAs and mRNAs in response to cold acclimation and cold stress in Pomacea canaliculata
Source: PubMed Central journal article supplement (PMC9121591; doi:10.1186/s12864-022-08622-5), 2022-05-19

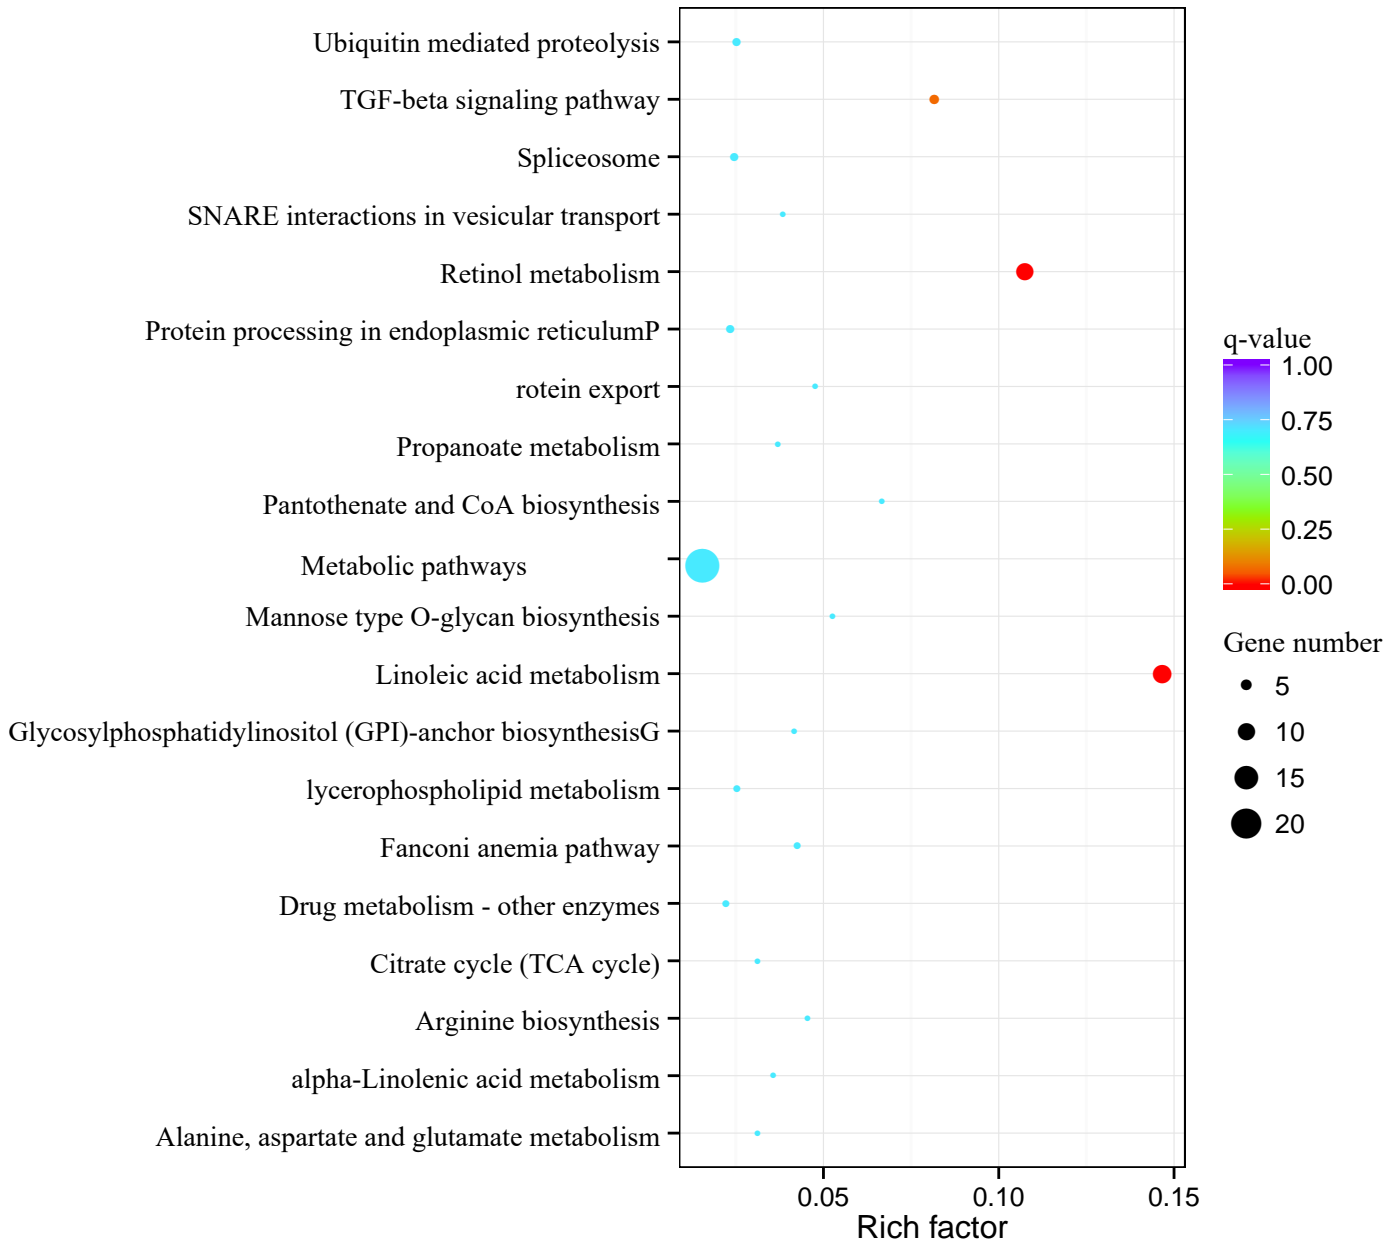

Supplement: 12864_2022_8622_MOESM2_ESM.pdf [file 12864_2022_8622_MOESM2_ESM.pdf]
